# Supplementary material for: Sulfamethoxazole (SMX) Alters Immune and Apoptotic Endpoints in Developing Zebrafish (Danio rerio)
Source: MDPI journal article supplement (doi:10.3390/toxics11020178), 2023-02-14
Supplement: s1 [file s1]

## SUPPLEMENTAL DATA

# Sulfamethoxazole (SMX) Alters Immune and Apoptotic Endpoints in Developing Zebrafish (*Danio rerio*)

Nazish Iftikhar <sup>1,2</sup>, Isaac Konig <sup>2,3</sup>, Cole English <sup>2</sup>, Emma Ivantsova <sup>2</sup>, Christopher L. Souders II <sup>2</sup>, Imran Hashmi <sup>1</sup> and Christopher J. Martyniuk <sup>2,4,\*</sup>

<sup>1</sup> Institute of Environmental Sciences and Engineering, School of Civil and Environmental Engineering, National University of Sciences and Technology, Sector H-12, Islamabad 44000, Pakistan

<sup>2</sup> Center for Environmental and Human Toxicology, Department of Physiological Sciences, College of Veterinary Medicine, University of Florida, Gainesville, FL 32611, USA

<sup>3</sup> Department of Chemistry, Federal University of Lavras (UFLA), Lavras 37203-202, Minas Gerais, Brazil

<sup>4</sup> UF Genetics Institute and Interdisciplinary Program in Biomedical Sciences Neuroscience, University of Florida, Gainesville, FL 32611, USA

\* Correspondence: cmartyn@ufl.edu; Tel.: +1-352-294-4642; Fax: +1-352-392-4707

**Supplemental Table S1.** Primers used for real-time PCR analysis.

| Gene name                              | Gene Symbol        | Forward (5' to 3')       | Reverse (5' to 3')          | Reference                |
|----------------------------------------|--------------------|--------------------------|-----------------------------|--------------------------|
| Acetylcholinesterase                   | <i>ache</i>        | GCTAATGAGCAAAAGCATGTGGGC | TATCTGTGATGTTAAGCAGACGAGGCA | NM_131846.2              |
| BCL2 Apoptosis Regulator               | <i>bcl-2</i>       | TCACTCGTTCAGACCCTCAT     | ACGCTTTCCACGCACAT           | Deng et al. 2009         |
| BCL2 Associated Agonist Of Cell Death  | <i>bad</i>         | CAAGCCTGGATAAACAC        | GGCAGATTGAAAGAAAG           | Lu et al. 2011           |
| BCL2 Associated X, Apoptosis Regulator | <i>bax</i>         | GGCTATTTCAACCAGGGTTCC    | TGCGAATCACCAATGCTGT         | Liu et al., 2021         |
| Beta-actin                             | <i>bactin</i>      | CGAGCAGGAGATGGGAACC      | CAACGGAAACGCTCATTGC         | Wang et al. 2018         |
| Caspase 3                              | <i>casp 3</i>      | CCGCTGCCCATCACTA         | ATCCTTTTCACGACCATCT         | Deng et al. 2009         |
| Caspase 7                              | <i>casp 7</i>      | TTCGAGTCCTGGTCGGAAGA     | CCTTGCTGCCATCCTGTAA         | MG957999.1               |
| Caspase 9                              | <i>casp 9</i>      | ACCTCAATGGCCAGAACTGTC    | TCCTCCAGCACACGATCAAG        | Deng et al. 2009         |
| Catalase                               | <i>cat</i>         | CTCCTGATGTGGCCCGATAC     | TCAGATGCCC GGCCATATTC       | Sarkar et al., 2014      |
| chemokine (C-X-C motif) ligand 18b     | <i>Cxcl-C1c</i>    | GGCATTACACCCAAAGCG       | GCGAGCACGATTCACGAGAG        | Stockhammer et al., 2009 |
| Glutathione peroxidase 1a              | <i>alias gpx1a</i> | CACCCTCTGTTTGCGTTCC      | CTCTTTAATATCAGCATCA         | Wu et al., 2016          |
| Heat shock protein 70                  | <i>hsp70</i>       | GAAGACGGCATCTTTGAGGTGA   | GGGCCCTCTTGTTCTGACTGAT      | Hahn et al., 2014        |
| Interferon Gamma                       | <i>ifng</i>        | GAATGGCTTGGCCGATACAGGATA | TCCTCCACCTTTGACTTGTCATC     | Jin et al., 2010         |
| Interleukin 17                         | <i>il-17a</i>      | CGAGAGCCTGTATCCTAC       | CGTAATCCTGGACCTCAA          | Zhang et al., 2014       |

|                                             |                         |                        |                        |                           |
|---------------------------------------------|-------------------------|------------------------|------------------------|---------------------------|
| Interleukin 1b                              | <i>IL-1β</i>            | TGGACTTCGCAGCACAAAATG  | GTTCACTTCACGCTCTTGGATG | Watzke et al., 2007       |
| Ribosomal 18s                               | <i>rps18</i>            | TCGCTAGTTGGCATCGTTTATG | CGGAGGTTCTGAAGACGATCA  | Wang et al. 2018          |
| Superoxide dismutase 1                      | <i>sod1 (Cu/Zn SOD)</i> | CAACACAAACGGCTGCATCA   | TTTGCAACACCACTGGCATC   | Sarkar et al., 2014       |
| Superoxide dismutase 2                      | <i>sod2 (Mn SOD)</i>    | AGCGTGACTTTGGCTCATTT   | ATGAGACCTGTGGTCCCTTG   | Sarkar et al., 2014       |
| Glutathione S-transferase                   | <i>gst</i>              | CTATACATGCGGCGAAGCT    | GGCATTGCTCTGGACGAT     | Mukhopadhyay et al., 2014 |
| Nuclear factor erythroid 2-related factor 2 | <i>nrf2a</i>            | CCAGATCCAATCGTGGAGTTT  | GAAGGATCCGTCTTCGGTTATG | Awoyemi et al., 2019      |

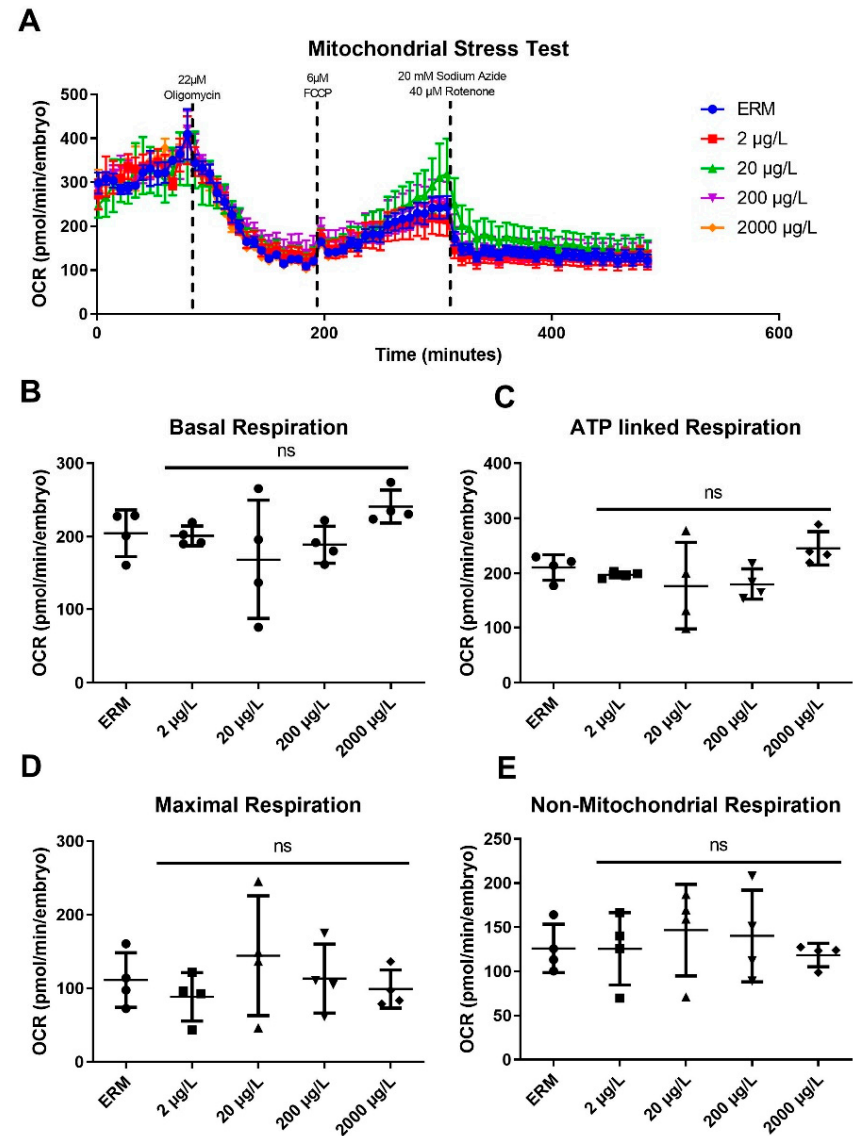

**Supplemental Figure S1.** Mitochondrial bioenergetics in 54 hpf zebrafish embryos. (A) Oxygen consumption rate (OCR); (B) basal respiration;

(C) ATP-linked respiration; (D) maximal respiration; (E) non-mitochondrial respiration. Data are reported as mean  $\pm$  SD (one-way ANOVA followed by Dunnett's multiple comparisons test,  $p > 0.05$ ).

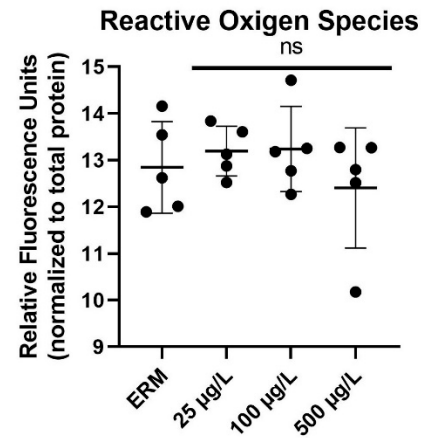

**Supplemental Figure S2.** Reactive oxygen species (ROS) in zebrafish embryos exposed to sulfamethoxazole for 7 days expressed as relative fluorescence units ( $\mu\text{g}/\text{mL}$  protein). Horizontal line represents mean value of the group ( $\pm\text{SD}$ ) (ANOVA followed by a Dunnett's test,  $n=5$  per treatment).

## References

- Awoyemi, O. M., Kumar, N., Schmitt, C., Subbiah, S., & Crago, J. (2019). Behavioral, molecular and physiological responses of embryo-larval zebrafish exposed to types I and II pyrethroids. *Chemosphere*, 219, 526-537.
- Deng, J., Yu, L., Liu, C., Yu, K., Shi, X., Yeung, L.W.Y., Lam, P.K.S., Wu, R.S.S., Zhou, B., 2009. Hexabromocyclododecane-induced developmental toxicity and apoptosis in zebrafish embryos. *Aquat. Toxicol.* 93, 29-36.
- Hahn, M.E., McArthur, A.G., Karchner, S.I., Franks, D.G., Jenny, M.J., Timme-Laragy, A.R., Stegeman, J.J., Woodin, B.R., Cipriano, M.J. and Linney, E., 2014. The transcriptional response to oxidative stress during vertebrate development: effects of tert-butylhydroquinone and 2, 3, 7, 8-tetrachlorodibenzo-p-dioxin. *PloS one*, 9(11), p.e113158.
- Jin, Y., Chen, R., Liu, W. and Fu, Z., 2010. Effect of endocrine disrupting chemicals on the transcription of genes related to the innate immune system in the early developmental stage of zebrafish (*Danio rerio*). *Fish & shellfish immunology*, 28(5-6), pp.854-861.
- Liu, L., Wu, F.Y., Zhu, C.Y., Zou, H.Y., Kong, R.Q., Ma, Y.K., Su, D., Song, G.Q., Zhang, Y. and Liu, K.C., 2021. Involvement of dopamine signaling pathway in neurodevelopmental toxicity induced by isoniazid in zebrafish. *Chemosphere*, 265, p.129109.
- Lu, J., Tsai, T., Choo, S., Yeh, S., Tang, R., Yang, A., Lee, H. and Lu, J., 2011. Induction of apoptosis and inhibition of cell growth by *tbx5* knockdown contribute to dysmorphogenesis in Zebrafish embryos. *Journal of biomedical science*, 18(1), pp.1-10.
- McCurley, A.T. and Callard, G.V., 2008. Characterization of housekeeping genes in zebrafish: male-female differences and effects of tissue type, developmental stage and chemical treatment. *BMC molecular biology*, 9(1), pp.1-12.
- Mukhopadhyay, D., & Chattopadhyay, A. (2014). Induction of oxidative stress and related transcriptional effects of sodium fluoride in female zebrafish liver. *Bulletin of environmental contamination and toxicology*, 93(1), 64-70.
- Murtha JM, Keller ET. Characterization of the heat shock response in mature zebrafish (*Danio rerio*). *Exp Gerontol.* 2003 Jun;38(6):683-91. doi: 10.1016/s0531-5565(03)00067-6. PMID: 12814804.

- Sarkar, S., Mukherjee, S., Chattopadhyay, A. and Bhattacharya, S., 2014. Low dose of arsenic trioxide triggers oxidative stress in zebrafish brain: expression of antioxidant genes. *Ecotoxicology and environmental safety*, 107, pp.1-8.
- Stockhammer, O.W., Zakrzewska, A., Hegedüs, Z., Spaink, H.P. and Meijer, A.H., 2009. Transcriptome profiling and functional analyses of the zebrafish embryonic innate immune response to Salmonella infection. *The Journal of Immunology*, 182(9), pp.5641-5653.
- Uribe, R.A., Kwon, T., Marcotte, E.M. and Gross, J.M., 2012. Id2a functions to limit Notch pathway activity and thereby influence the transition from proliferation to differentiation of retinoblasts during zebrafish retinogenesis. *Developmental biology*, 371(2), pp.280-292.
- Wang W-L, Hong J-R, Lin G-H, Liu W, Gong H-Y, Lu M-W, et al. (2011) Stage-Specific Expression of TNF $\alpha$  Regulates Bad/Bid-Mediated Apoptosis and RIP1/ROS-Mediated Secondary Necrosis in Birnavirus-Infected Fish Cells. *PLoS ONE* 6(2): e16740.
- Wang, X.H., Souders 2nd, C.L., Zhao, Y.H., Martyniuk, C.J. 2018. Paraquat affects mitochondrial bioenergetics, dopamine system expression, and locomotor activity in zebrafish (*Danio rerio*). *Chemosphere*. 191, 106-117.
- Watzke, J., Schirmer, K. and Scholz, S., 2007. Bacterial lipopolysaccharides induce genes involved in the innate immune response in embryos of the zebrafish (*Danio rerio*). *Fish & shellfish immunology*, 23(4), pp.901-905.
- Wu, S., Ji, G., Liu, J., Zhang, S., Gong, Y. and Shi, L., 2016. TBBPA induces developmental toxicity, oxidative stress, and apoptosis in embryos and zebrafish larvae (*Danio rerio*). *Environmental toxicology*, 31(10), pp.1241-1249.
- Yang, L., Ivantsova, E., Souders II, C.L. and Martyniuk, C.J., 2021. The agrochemical S-metolachlor disrupts molecular mediators and morphology of the swim bladder: Implications for locomotor activity in zebrafish (*Danio rerio*). *Ecotoxicology and Environmental Safety*, 208, p.111641.
- Zhang, H., Shen, B., Wu, H., Gao, L., Liu, Q., Wang, Q., Xiao, J. and Zhang, Y., 2014. Th17-like immune response in fish mucosal tissues after administration of live attenuated *Vibrio anguillarum* via different vaccination routes. *Fish & shellfish immunology*, 37(2), pp.229-238.
